# Supplementary material for: On the potential of using smartphone sensors for wildfire hazard estimation
Source: Copernicus journal article supplement (doi:10.5194/nhess-2023-211), 2024-01-02
Supplement: Supplementary file [file nhess-2023-211-AC2-supplement.pdf]

In this article, the authors present a useful tool available to virtually anyone (Android cell phones) to address the challenge that poses wildfires with 2 study cases in Portugal and Israel. Overall, it is well written in academic English, easy to follow, provides a large range of well-done figures, and gives 2 interesting study cases with thorough research.

We thank this reviewer for the positive response. We have addressed the comments below.

My comments to improve the paper are more focused on the main theme of the article because the technical issues were treated by reviewer 1 and resolved by the authors:

1. I think it could be necessary to work on the title, abstract, and discussion about what could be the most interesting part of the experiment which is the citizen science. It could bring novelty to the topic of wildfire hazard monitoring empowering citizens of all ages. A possible title could be: "Experiencing the Potential of Use of Android Smartphone Sensors in Wildfire Hazard Estimation through Citizen Science".

This is an interesting idea emphasizing citizen science. We have now changed the title to: "On the potential of using smartphone sensors for wildfire hazard estimation through Citizen Science."

2. Also, in my opinion, it was not very clear in the introduction, methodology, and discussion which could be the main reader of this article. Paragraphs 355-370 enumerated some potential readers, but they are mentioned at the end of the article and did not permeate through the entire manuscript. Was it written for citizen science advocates? For wildfire researchers? For public policy specialists in wildfires, climate, and disasters? For engineers who work in big data? For governments in low-income countries who cannot afford an abundance of meteorological stations? This lack of definition debilitated an otherwise good article and must be clearly stated throughout the manuscript, please consider a major revision from peers in those abovementioned topics.

While this paper is a scientific paper submitted to a scientific journal, we agree that there may be many possible interested parties in the results of the study. Hence, we have added a sentence up front in the abstract related to the possible users of this technology.

3. It will be very important to add in paragraph 145 that the WeatherSignal App does not operate in IOS (iPhone) and it is available only for Android smartphones. This should be repeated in the limitations of this study (paragraphs 365 and 370).

We have added a sentence to note this.

3. In aspects of formatting, please use the table model from the journal.

Done
